# Supplementary material for: Development and Application of a New Exponential Model for Hydraulic Conductivity with Depth of Rock Mass
Source: MDPI journal article supplement (doi:10.3390/w16050778), 2024-03-05
Supplement: s1 [file s1]

# Development and Application of a New Exponential Model for Hydraulic Conductivity with Depth of Rock Mass

Zhi Dou <sup>1,\*</sup>, Xin Huang <sup>1</sup>, Weifeng Wan <sup>2</sup>, Feng Zeng <sup>2</sup> and Chaoqi Wang <sup>1,\*</sup>

<sup>1</sup> School of Earth Sciences and Engineering, Hohai University, Nanjing 210098, China; 211309080005@hhu.edu.cn

<sup>2</sup> Yellow River Engineering Consulting Co., Ltd., Zhengzhou 450003, China; wwfmt@163.com (W.W.); zengfeng1982@126.com (F.Z.)

\* Correspondence: douz@hhu.edu.cn (Z.D.); 20220954@hhu.edu.cn (C.W.)

**Contents:**

1. Other sensitive analysis
2. The conversion method for hydraulic conductivity
3. Normalization method
4. The engineering project area data
5. Datasets collected from other literature

## 1. Other sensitive analysis

Sensitivity analyses were performed for the exponential and power-like models in the range 0 to 5km, setting the baseline:  $\log K_s = -5$ ,  $\log K_r = -11$ , and  $\alpha = 1.2$ . Figure S1 shows that the decay rate of both models increases as the residual hydraulic conductivity ( $\log K_r$ ) decreases. However, the decay rate of the exponential model is faster than that of the power-like model, and the hydraulic conductivity of the exponential model decays steadily up to  $\log K_r$  easier. This reflects that for the same parameter like  $\log K_s$  and  $\alpha$ , the exponential model decays faster than the power-like model.

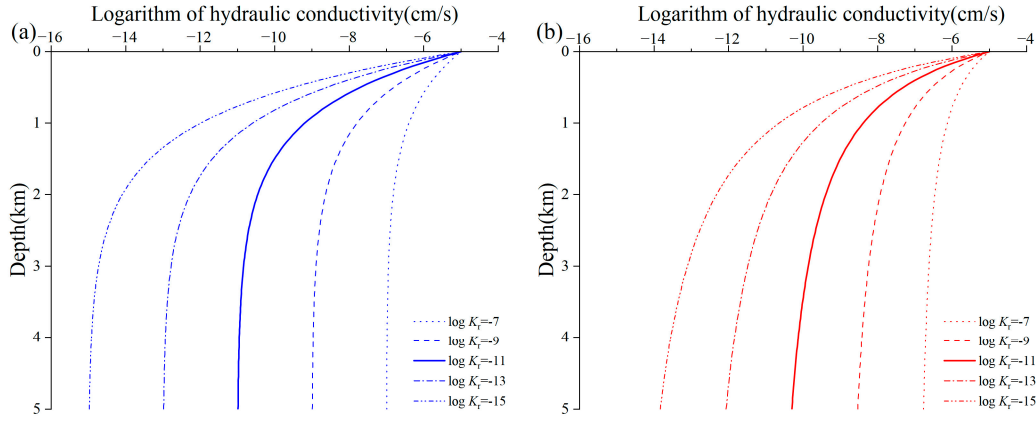

**Figure S1 Sensitivity analysis of two models on  $\log K_r$ , (a) proposed exponential model and (b) the power-like model.**

Figure S2 focus on the effect of the decay coefficient  $\alpha$  on the models. When the decay coefficient  $\alpha$  increases, the hydraulic conductivity curves of two models shift to the left. The larger the decay coefficient  $\alpha$ , the distance that the curve shifts to the left is shorter. For the exponential model, a smaller decay coefficient  $\alpha$  (like  $\alpha=0.6$ ) allows the curve to approach the residual hydraulic conductivity  $\log K_r$ , whereas for the power-like model, a larger decay coefficient  $\alpha$  (like  $\alpha=1.8$ ) allows the curve to stabilize around the residual hydraulic conductivity  $\log K_r$ . Thus the exponential model requires a smaller value of  $\alpha$  for the permeability coefficient to stabilize. This further illustrates that the exponential model is more suitable for patterns where the distribution of hydraulic conductivities is more concentrated.

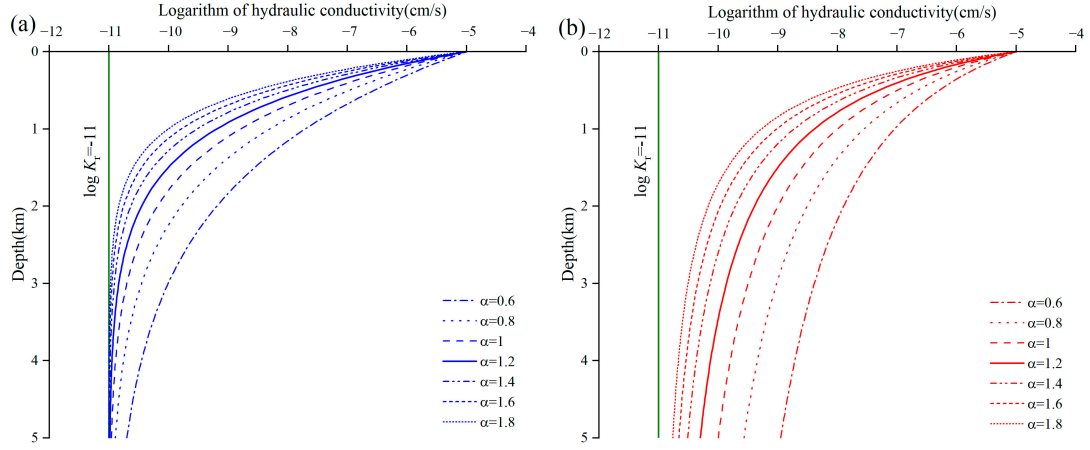

**Figure S2 Sensitivity analysis of two models on  $\alpha$  (a) proposed exponential model and (b) the power-like model.**

Based on above discussion, the actual decay rate is a function of the decay coefficient  $\alpha$ ,  $\log K_r - \log K_s$ . For the case where the decay mode is more concentrated (e.g. due to the influence of weathering unloading, the surface hydraulic conductivities fluctuate greatly while the deep hydraulic conductivities are more intense), the exponential model is more applicable due to the characteristics of easier attenuation to the stable  $\log K_r$ . On the other hand, for the case where the decay mode is more dispersed (the deep hydraulic conductivities are not concentrated), the power-like model is more applicable.

## 2. The conversion method for hydraulic conductivity

The hydraulic conductivity  $K$  and the permeability  $k$  can be transformed standardly by the following equation, where  $\rho$  is the density of the fluid and  $\mu$  is the viscosity of the fluid:

$$K = k\rho g/\mu \quad (S1)$$

The relationship is not consistent. It is acceptable to use the constants at 25°C for estimation, due to the low depth of data points in the database. The approximate Eq. 10 is expressed as:

$$K = 1.1 \times 10^9 k \quad (S2)$$

where the unit of the hydraulic conductivity  $K$  is cm/s and the permeability  $k$  is in  $m^2$ .

The lugeon value is determined by conducting the packer test. The packer test is conducted at three levels of pressure. The process can be divided into five stages about

pressure application and pressure release. In the pressure application stage, the pressure increases from  $P_1$  to  $P_2$  and then to  $P_3$ . In the pressure release stage, it decreases again from  $P_3$  to  $P_2$  and then to  $P_1$  ( $P_1=0.3\text{MPa}$ ,  $P_2=0.6\text{MPa}$ ,  $P_3=1\text{MPa}$ ). The lugeon value can be expressed as:

$$q = Q_3 / (P_3 * L) \quad (\text{S3})$$

where  $q$  is the lugeon value of the test section,  $Q_3$  is the flow rate of the third stage,  $P_3$  is the test pressure of the third stage, and  $L$  is the length of the test section.

There is no precise conversion relationship between the lugeon value and the hydraulic conductivity. If the water flow is laminar and the lugeon value is less than 10, the conversion can be made using the following equation:

$$K = \frac{Q_3}{2\pi HL} \ln \frac{1}{r} \quad (\text{S4})$$

where  $K$  is the hydraulic conductivity of the test section,  $Q_3$  is the flow rate of the third stage,  $H$  is the water head of the third stage,  $L$  is the length of the test section, and  $r$  is the borehole radius.

If there is insufficient information about the packer test, take the third stage flow rate  $Q_3$  as 1L/min, the head difference  $H$  as 100m, the length of the test section as 1m, then the lugeon value is 1Lu by Eq. 12. For common boreholes with diameters of 56 to 150mm, the following equation can be used as an approximation:

$$K = 1.24 \times 10^{-5} q \quad (\text{S5})$$

where the unit of the hydraulic conductivity  $K$  is cm/s and the lugeon value  $q$  is in Lu.

### 3. Normalization method

Data normalization is a method of scaling characteristics and is a key step in data pre-processing. Evaluation indicators often have large numerical differences with the difference in magnitude, which can affect the results of data analysis. To eliminate these effects, data normalization is required to address the comparability of data indicators. After the raw data have been normalized the indicators will be of the same order of magnitude, making them suitable for comprehensive comparative evaluation. Normalization is essentially a linear transformation, and there are many good properties of linear transformations that ensure that changes to the data do not "invalidate" the

data, but rather improve its performance, which is a prerequisite for normalization. Common mapping ranges are [0, 1] and [-1, 1]. The most common normalization method is Min-Max normalization, also known as divergence normalization, which is a linear transformation of the original data such that the resultant values map between [0, 1]. The transformation function is as follows:

$$X_{new} = \frac{X - X_{min}}{X_{max} - X_{min}} \quad (S6)$$

where  $X_{max}$  is the maximum value of the sample data and  $X_{min}$  is the minimum value of the sample data.

The decay rate  $\beta$  in the paper were normalized using the method described above so that the compared decay rates  $\beta$  were all in the interval (0, 1). The closer the decay rates are to 0, the closer the hydraulic conductivities converge to residual hydraulic conductivity.

#### 4. The engineering project area data

In Chapter “Application of the exponential model to engineering” of the paper, we apply the exponential model to a specific project area. Several major faults pass through the engineering area as Table S1. A number of boreholes were drilled in this project area and a lot of permeability data was obtained as Table S2.

Table S1 Major faults information for the engineering project

| Fault name | Length(Km) | Fault strike | Fault dip | Property         |
|------------|------------|--------------|-----------|------------------|
| F2         | 81         | NW           | S         | strike-slip      |
| F3         | 105        | NWW          | SW        | Thrust tectonics |
| F5         | 170        | EW-NWW       | N         | strike-slip      |
| F6         | 180        | NWW          | S         | strike-slip      |

Table S2 The borehole hydraulic conductivity information

| Borehole Description            | Depth(m) | Log K(cm/s) |
|---------------------------------|----------|-------------|
| QZK01-02                        | 1.5      | -3.77995    |
| Mean burial depth is 115m       | 5.4      | -3.23209    |
| Main lithology is granodiorite/ | 6.8      | -4.04141    |

---

|                        |      |          |
|------------------------|------|----------|
| without fault crossing | 15   | -3.17215 |
|                        | 24   | -3.42969 |
|                        | 24.5 | -3.20273 |
|                        | 27.1 | -3.89449 |
|                        | 29.5 | -3.93554 |
|                        | 32.1 | -4.25493 |
|                        | 34.5 | -3.97881 |
|                        | 37.1 | -4.5544  |
|                        | 39.5 | -3.29671 |
|                        | 42.1 | -3.80382 |
|                        | 44.5 | -3.4034  |
|                        | 47.1 | -4.11805 |
|                        | 49.5 | -3.59176 |
|                        | 52.1 | -3.22475 |
|                        | 54.5 | -3.31515 |
|                        | 57.1 | -3.07469 |
|                        | 59.5 | -3.42022 |
|                        | 62.1 | -3.73518 |
|                        | 64.5 | -4.08092 |
|                        | 67.1 | -3.17134 |
|                        | 69.5 | -4.42022 |
|                        | 72.1 | -3.47756 |
|                        | 74.5 | -3.54212 |
|                        | 77.1 | -3.37366 |
|                        | 79.5 | -3.40012 |
|                        | 82.1 | -3.37161 |
|                        | 84.5 | -3.19654 |
|                        | 87.1 | -3.61618 |
|                        | 89.5 | -3.02919 |

---

|                                 |       |          |
|---------------------------------|-------|----------|
|                                 | 92.1  | -4.03152 |
|                                 | 94.5  | -3.08566 |
|                                 | 97.3  | -3.90309 |
|                                 | 99.5  | -3.28651 |
|                                 | 104.5 | -3.28819 |
|                                 | 109.5 | -3.45223 |
|                                 | 114.5 | -3.64207 |
|                                 | 119.5 | -3.31247 |
|                                 | 124.5 | -3.47366 |
|                                 | 128.5 | -3.54821 |
| QZK03~12                        | 1     | -3.99823 |
| Mean burial depth is 90m        | 1.8   | -3.98352 |
| Main lithology is granodiorite/ | 2     | -4.00941 |
| without fault crossing          | 2     | -4.17309 |
|                                 | 3     | -4.04487 |
|                                 | 3.1   | -4.00211 |
|                                 | 4.9   | -4.17851 |
|                                 | 4.9   | -4.09136 |
|                                 | 5     | -4.07182 |
|                                 | 5     | -4.11077 |
|                                 | 5     | -4.03882 |
|                                 | 5.6   | -4.28971 |
|                                 | 6.1   | -4.20846 |
|                                 | 7.5   | -4.07665 |
|                                 | 7.5   | -4.23597 |
|                                 | 7.5   | -4.35223 |
|                                 | 8.3   | -4.27258 |
|                                 | 8.5   | -4.10516 |
|                                 | 9     | -4.16391 |



---

|      |          |
|------|----------|
| 9.6  | -4.40666 |
| 9.6  | -4.26715 |
| 10   | -4.26793 |
| 11   | -4.25852 |
| 11.5 | -4.25618 |
| 12.1 | -4.27376 |
| 12.5 | -4.2426  |
| 12.5 | -4.19368 |
| 12.5 | -4.42205 |
| 14.8 | -4.16276 |
| 16.5 | -4.31186 |
| 16.5 | -4.28651 |
| 17   | -4.39911 |
| 17.1 | -4.42205 |
| 17.5 | -4.33951 |
| 17.5 | -4.34266 |
| 17.5 | -4.10491 |
| 17.5 | -4.33124 |
| 17.5 | -4.47573 |
| 19.9 | -4.33002 |
| 21.5 | -4.32818 |
| 22.1 | -4.55721 |
| 22.5 | -4.36091 |
| 22.5 | -4.41454 |
| 22.5 | -4.29964 |
| 22.5 | -4.09173 |
| 22.5 | -4.54363 |
| 22.5 | -4.80024 |
| 25   | -4.37965 |

---

---

|      |          |
|------|----------|
| 26   | -4.4005  |
| 26.5 | -4.26664 |
| 27.5 | -4.33124 |
| 27.5 | -4.51456 |
| 27.5 | -4.14972 |
| 27.5 | -4.20121 |
| 27.5 | -4.05988 |
| 27.5 | -4.44009 |
| 27.5 | -4.53047 |
| 27.5 | -4.56767 |
| 31.5 | -4.33329 |
| 32.1 | -4.64474 |
| 32.5 | -4.60836 |
| 32.5 | -4.43227 |
| 32.5 | -4.42713 |
| 32.5 | -4.42458 |
| 32.5 | -4.14972 |
| 32.5 | -4.39513 |
| 32.5 | -4.65758 |
| 33   | -4.52272 |
| 36.5 | -4.3999  |
| 37.1 | -4.67081 |
| 37.5 | -4.45346 |
| 37.5 | -4.55377 |
| 37.5 | -4.36311 |
| 37.5 | -4.50836 |
| 37.5 | -4.15652 |
| 37.5 | -4.55377 |
| 37.5 | -4.66194 |

---

---

|      |          |
|------|----------|
| 40   | -4.60944 |
| 41.5 | -4.43227 |
| 42.1 | -4.74909 |
| 42.5 | -4.75449 |
| 42.5 | -4.41953 |
| 42.5 | -4.49026 |
| 42.5 | -4.31319 |
| 42.5 | -4.26664 |
| 42.5 | -4.19219 |
| 42.5 | -4.45346 |
| 42.5 | -4.55377 |
| 46.5 | -4.48439 |
| 47.1 | -4.75449 |
| 47.5 | -5.04479 |
| 47.5 | -4.47289 |
| 47.5 | -4.45892 |
| 47.5 | -4.49921 |
| 47.5 | -4.42205 |
| 47.5 | -4.15927 |
| 47.5 | -4.56067 |
| 47.5 | -4.52724 |
| 51.5 | -4.36311 |
| 52.1 | -4.71806 |
| 52.5 | -4.94157 |
| 52.5 | -4.60836 |
| 52.5 | -4.48149 |
| 52.5 | -4.46725 |
| 52.5 | -4.32514 |
| 52.5 | -4.25964 |

---

---

|      |          |
|------|----------|
| 52.5 | -4.50224 |
| 52.5 | -4.56767 |
| 56.5 | -4.55721 |
| 57.1 | -4.71309 |
| 57.5 | -4.83803 |
| 57.5 | -4.31417 |
| 57.5 | -4.44806 |
| 57.5 | -4.35438 |
| 57.5 | -4.37202 |
| 57.5 | -4.3292  |
| 57.5 | -4.52724 |
| 57.5 | -4.71309 |
| 61.5 | -4.48149 |
| 62.1 | -4.69379 |
| 62.5 | -4.9017  |
| 62.5 | -4.56067 |
| 62.5 | -4.37428 |
| 62.5 | -4.34795 |
| 62.5 | -4.46445 |
| 62.5 | -4.39041 |
| 62.5 | -4.41953 |
| 62.5 | -5.10127 |
| 66.5 | -4.54699 |
| 67.1 | -4.74376 |
| 67.5 | -4.80632 |
| 67.5 | -4.68909 |
| 67.5 | -4.47006 |
| 67.5 | -4.51456 |
| 67.5 | -4.35438 |

---

---

|      |          |
|------|----------|
| 67.5 | -4.49026 |
| 67.5 | -4.81248 |
| 68.4 | -4.5857  |
| 71.5 | -4.64898 |
| 72.1 | -4.74909 |
| 72.5 | -4.96738 |
| 72.5 | -4.58939 |
| 72.5 | -4.67985 |
| 72.5 | -4.48149 |
| 72.5 | -4.41454 |
| 72.5 | -4.51145 |
| 72.5 | -4.4786  |
| 72.5 | -4.80024 |
| 76.5 | -4.7333  |
| 77.1 | -4.79425 |
| 77.5 | -5.04479 |
| 77.5 | -4.62819 |
| 77.5 | -4.77109 |
| 77.5 | -4.5784  |
| 77.5 | -4.39751 |
| 77.5 | -4.64898 |
| 77.5 | -4.55721 |
| 77.5 | -4.38112 |
| 81.5 | -4.5857  |
| 82.1 | -4.67985 |
| 82.5 | -5.11351 |
| 82.5 | -4.67985 |
| 82.5 | -4.56767 |
| 82.5 | -4.51145 |

---

|                                 |       |          |
|---------------------------------|-------|----------|
|                                 | 82.5  | -4.41454 |
|                                 | 82.5  | -4.68909 |
|                                 | 82.5  | -4.29585 |
|                                 | 86.5  | -4.77676 |
|                                 | 87.1  | -4.69379 |
|                                 | 87.5  | -4.98548 |
|                                 | 87.5  | -4.82507 |
|                                 | 87.5  | -4.69144 |
|                                 | 87.5  | -4.36311 |
|                                 | 87.5  | -4.78252 |
|                                 | 88    | -4.75449 |
|                                 | 90.3  | -4.67985 |
|                                 | 92    | -4.75721 |
|                                 | 92.1  | -4.56767 |
|                                 | 92.5  | -4.81248 |
|                                 | 92.9  | -4.69616 |
|                                 | 97.1  | -4.63639 |
|                                 | 102.1 | -4.75449 |
|                                 | 107.1 | -4.76548 |
|                                 | 112.1 | -4.84466 |
|                                 | 117.1 | -4.84802 |
| SZK01                           | 4     | -3.12867 |
| Burial depth is 190m            | 7.8   | -3.16883 |
| Main lithology is granodiorite/ | 10.3  | -3.27432 |
| without fault crossing          | 15.9  | -3.24427 |
|                                 | 26    | -3.35111 |
|                                 | 36    | -3.22308 |
|                                 | 45    | -3.49898 |
|                                 | 55    | -3.34227 |

|                                 |       |          |
|---------------------------------|-------|----------|
|                                 | 65    | -3.39255 |
|                                 | 75    | -3.67438 |
|                                 | 85    | -3.45143 |
|                                 | 95    | -3.5497  |
|                                 | 105   | -3.60022 |
|                                 | 114   | -3.54314 |
|                                 | 120   | -3.4371  |
|                                 | 122.5 | -3.12537 |
|                                 | 127.5 | -3.35507 |
|                                 | 132.5 | -3.53546 |
|                                 | 137.5 | -3.68484 |
|                                 | 142.5 | -3.76494 |
|                                 | 147.5 | -3.79334 |
|                                 | 152.5 | -3.91438 |
|                                 | 157.5 | -3.83006 |
|                                 | 162.5 | -3.78751 |
|                                 | 167.5 | -2.98297 |
|                                 | 172.5 | -3.77047 |
|                                 | 177.5 | -3.83006 |
|                                 | 182.5 | -3.94656 |
|                                 | 187.5 | -4.03932 |
| SZK03                           | 7     | -3.64584 |
| Burial depth is 840m            | 15    | -3.80859 |
| Main lithology is granodiorite/ | 21    | -4.11467 |
| without fault crossing          | 26.3  | -4.18847 |
|                                 | 31.2  | -4.32624 |
|                                 | 39.8  | -4.59552 |
|                                 | 44.5  | -4.56953 |
|                                 | 51    | -4.37822 |

---

|       |          |
|-------|----------|
| 57    | -4.40762 |
| 61.8  | -4.48874 |
| 78.5  | -4.07823 |
| 84    | -3.9038  |
| 103.5 | -3.73507 |
| 120   | -4.16909 |
| 130.1 | -4.32754 |
| 140   | -3.99354 |
| 150   | -4.49025 |
| 160.9 | -4.54049 |
| 175   | -3.72969 |
| 190   | -3.48895 |
| 205   | -3.59027 |
| 221.8 | -3.41396 |
| 243.5 | -4.02668 |
| 254.5 | -3.77958 |
| 294.6 | -4.19866 |
| 345.9 | -4.22573 |
| 376   | -4.10453 |
| 405   | -4.05507 |
| 437   | -4.23838 |
| 469   | -4.00503 |
| 499.3 | -4.00841 |
| 530   | -4.26847 |
| 558.7 | -4.46112 |
| 570.9 | -4.16284 |
| 586.9 | -4.26034 |
| 619.4 | -4.4977  |
| 648.5 | -4.73919 |

---



|                          |       |          |
|--------------------------|-------|----------|
|                          | 664.1 | -4.30628 |
|                          | 712.1 | -4.20579 |
|                          | 746   | -4.03153 |
|                          | 772.5 | -4.43726 |
|                          | 777.5 | -4.16564 |
|                          | 782.5 | -4.32212 |
|                          | 787.5 | -4.99047 |
|                          | 792.5 | -5.10627 |
|                          | 797.5 | -4.86323 |
|                          | 802.5 | -5.00936 |
|                          | 807.5 | -4.50421 |
|                          | 812.5 | -5.08279 |
|                          | 817.5 | -5.10627 |
|                          | 822.5 | -5.4073  |
|                          | 827.5 | -5.38382 |
|                          | 832.5 | -5.23121 |
|                          | 837.5 | -4.74349 |
| SZK04                    | 6.8   | -3.41213 |
| Burial depth is 666m     | 22.7  | -3.19105 |
| Main lithology is        | 40    | -3.24552 |
| conglomerate, sandstone, | 56.4  | -3.41052 |
| mudstone/ without fault  | 66    | -3.46867 |
| crossing                 | 84    | -4.04962 |
|                          | 101   | -3.32223 |
|                          | 111   | -3.42735 |
|                          | 117.6 | -3.56859 |
|                          | 131.5 | -3.38186 |
|                          | 145.9 | -3.89568 |
|                          | 165   | -3.82768 |

---

|       |          |
|-------|----------|
| 186   | -3.48173 |
| 208   | -3.03041 |
| 223.8 | -3.25761 |
| 239.7 | -3.12027 |
| 252.7 | -3.5561  |
| 294.6 | -3.50813 |
| 320   | -2.95892 |
| 343   | -2.91218 |
| 363.6 | -3.98045 |
| 397   | -3.46642 |
| 431.6 | -3.71094 |
| 450   | -4.05774 |
| 476.6 | -3.97145 |
| 499.7 | -4.25372 |
| 515   | -3.91031 |
| 542.1 | -3.9268  |
| 559.8 | -4.04442 |
| 586.8 | -4.24615 |
| 602.5 | -4.36372 |
| 607.5 | -4.32411 |
| 612.5 | -4.62514 |
| 617.5 | -4.55536 |
| 622.5 | -4.60187 |
| 627.5 | -4.18113 |
| 632.5 | -4.53546 |
| 637.5 | -4.87018 |
| 642.5 | -4.50421 |
| 647.5 | -4.83649 |
| 652.5 | -4.66693 |

---

|                                 |       |          |
|---------------------------------|-------|----------|
|                                 | 657.5 | -4.59811 |
|                                 | 662.5 | -4.53224 |
| SZK05                           | 15.81 | -4.01757 |
| Burial depth is 430m            | 36.61 | -3.76966 |
| Main lithology are schist,      | 66.7  | -3.5553  |
| marble, phyllite/ without fault | 104   | -3.79802 |
| crossing                        | 145   | -3.8819  |
|                                 | 182   | -3.47141 |
|                                 | 229   | -4.2247  |
|                                 | 271.4 | -4.64124 |
|                                 | 286.6 | -4.16771 |
|                                 | 294.8 | -4.26936 |
|                                 | 323   | -4.06033 |
|                                 | 338.5 | -4.91664 |
|                                 | 357   | -4.5922  |
|                                 | 362.5 | -4.59069 |
|                                 | 367.5 | -4.55536 |
|                                 | 372.5 | -4.64973 |
|                                 | 377.5 | -4.55536 |
|                                 | 382.5 | -4.51955 |
|                                 | 387.5 | -4.66693 |
|                                 | 392.5 | -4.66257 |
|                                 | 397.5 | -4.59811 |
|                                 | 402.5 | -4.59069 |
| SZK06~09                        | 7     | -5.29581 |
| Burial depth is 100m            | 9.5   | -5.04928 |
| Main lithology are sandstone,   | 14    | -5.04048 |
| argillaceous siltstone,         | 17.5  | -5.13616 |
| mudstone/ without fault         | 20    | -4.928   |

---

|          |       |          |
|----------|-------|----------|
| crossing | 22    | -4.79418 |
|          | 22.5  | -4.64171 |
|          | 25    | -4.66114 |
|          | 27.5  | -4.72096 |
|          | 27.5  | -4.86707 |
|          | 30    | -4.75934 |
|          | 30    | -4.91892 |
|          | 32.5  | -4.70652 |
|          | 32.5  | -4.87494 |
|          | 35    | -4.70926 |
|          | 35    | -4.67686 |
|          | 37.5  | -4.75529 |
|          | 37.5  | -4.70572 |
|          | 50    | -4.52806 |
|          | 53    | -4.44156 |
|          | 54    | -5.91735 |
|          | 56.5  | -5.80656 |
|          | 59    | -5.5892  |
|          | 60.6  | -4.54746 |
|          | 61.5  | -5.53299 |
|          | 64    | -5.48798 |
|          | 66.5  | -5.52301 |
|          | 69.2  | -5.55559 |
|          | 90    | -5.26185 |
|          | 93    | -5.2294  |
|          | 95    | -5.30985 |
|          | 97.5  | -5.29325 |
|          | 112.5 | -5.08247 |
|          | 115   | -5.17167 |

---

|                              |       |          |
|------------------------------|-------|----------|
|                              | 127.5 | -4.87331 |
|                              | 130   | -4.99555 |
|                              | 132.5 | -5.04814 |
|                              | 135   | -5.04674 |
|                              | 137.5 | -5.07048 |
|                              | 150   | -5.02278 |
|                              | 152.5 | -5.05402 |
|                              | 155   | -5.10204 |
| SZK10                        | 8     | -3.10031 |
| Burial depth is 580m         | 16    | -3.027   |
| Main lithology are phyllite, | 24.7  | -3.79857 |
| limestone/with F6 fault      | 34    | -4.20396 |
| crossing                     | 47.7  | -4.2173  |
|                              | 65    | -4.29192 |
|                              | 86    | -4.27137 |
|                              | 102.1 | -4.25647 |
|                              | 120   | -3.65683 |
|                              | 142   | -3.47983 |
|                              | 165   | -2.92971 |
|                              | 180   | -3.3303  |
|                              | 199.6 | -3.65812 |
|                              | 220   | -3.48515 |
|                              | 241   | -3.72566 |
|                              | 263   | -3.90361 |
|                              | 285   | -4.60896 |
|                              | 300   | -4.14936 |
|                              | 319.1 | -4.19691 |
|                              | 351.7 | -4.60473 |
|                              | 358.9 | -4.54919 |

|                               |       |          |
|-------------------------------|-------|----------|
|                               | 366.8 | -5.01966 |
|                               | 382   | -5.01325 |
|                               | 397   | -4.96994 |
|                               | 411.1 | -5.03581 |
|                               | 427.4 | -4.98011 |
|                               | 439.6 | -5.14985 |
|                               | 453   | -4.97658 |
|                               | 468   | -5.01823 |
|                               | 487.2 | -5.01463 |
|                               | 503.6 | -4.43615 |
|                               | 512.5 | -3.53579 |
|                               | 517.5 | -5.06051 |
|                               | 522.5 | -5.20017 |
|                               | 527.5 | -5.06051 |
|                               | 532.5 | -4.9636  |
|                               | 537.5 | -4.97237 |
|                               | 542.5 | -4.89172 |
|                               | 547.5 | -4.76494 |
|                               | 552.5 | -4.76494 |
|                               | 557.5 | -4.66257 |
|                               | 562.5 | -5.18545 |
|                               | 567.5 | -5.06051 |
|                               | 572.5 | -4.88442 |
|                               | 577.5 | -4.81747 |
| SZK13                         | 6.3   | -3.32902 |
| Burial depth is 980m          | 23    | -3.88572 |
| Main lithology are sandstone, | 41    | -4.18675 |
| conglomerate/ with F3 fault   | 58    | -3.98016 |
| crossing                      | 75    | -4.18091 |

---

|       |          |
|-------|----------|
| 91.9  | -4.08649 |
| 103   | -4.0231  |
| 117   | -3.96984 |
| 136.4 | -3.46929 |
| 146   | -3.68518 |
| 164   | -3.56558 |
| 183.9 | -3.59356 |
| 212.4 | -3.01731 |
| 238   | -3.92552 |
| 264   | -4.40384 |
| 290   | -4.54415 |
| 310.4 | -4.82471 |
| 343   | -4.99308 |
| 360   | -5.04542 |
| 382   | -4.9612  |
| 400.3 | -4.56886 |
| 412.2 | -5.13164 |
| 427   | -5.09076 |
| 445.3 | -5.17722 |
| 490.5 | -5.06517 |
| 535.7 | -5.22719 |
| 591.3 | -5.01199 |
| 622.6 | -4.42421 |
| 636.1 | -4.35475 |
| 654   | -4.12449 |
| 668.3 | -5.15153 |
| 683   | -4.27814 |
| 700.7 | -4.02399 |
| 747.1 | -4.74147 |

---

|                               |       |          |
|-------------------------------|-------|----------|
|                               | 760.6 | -4.85811 |
|                               | 780   | -4.25123 |
|                               | 802.4 | -4.11018 |
|                               | 833.5 | -4.66261 |
|                               | 846.5 | -4.58685 |
|                               | 871.4 | -4.71216 |
|                               | 905   | -4.5769  |
|                               | 912.5 | -4.31232 |
|                               | 917.5 | -4.27696 |
|                               | 922.5 | -4.46667 |
|                               | 927.5 | -4.87018 |
|                               | 932.5 | -4.39306 |
|                               | 937.5 | -4.61725 |
|                               | 942.5 | -4.87724 |
|                               | 947.5 | -4.99047 |
|                               | 952.5 | -5.23121 |
|                               | 957.5 | -4.97237 |
|                               | 962.5 | -5.04979 |
|                               | 967.5 | -5.04979 |
|                               | 972.5 | -4.81131 |
|                               | 977.5 | -5.01912 |
| SZK18                         | 15    | -4.291   |
| Burial depth is 910m          | 30.4  | -4.28613 |
| Main lithology are sandstone, | 39    | -4.62542 |
| conglomerate, mudstone/ with  | 58    | -4.0581  |
| F5 fault crossing             | 77    | -4.13857 |
|                               | 96    | -4.44729 |
|                               | 115   | -4.34728 |
|                               | 124   | -3.59754 |



---

|       |          |
|-------|----------|
| 144   | -3.12263 |
| 163   | -4.34966 |
| 184   | -4.01858 |
| 202   | -4.3458  |
| 220   | -4.29064 |
| 243   | -4.71119 |
| 265   | -4.62796 |
| 280   | -4.75437 |
| 300   | -4.53998 |
| 325.5 | -4.50662 |
| 346   | -4.92395 |
| 370   | -5.07046 |
| 396   | -4.86189 |
| 420   | -4.89564 |
| 446   | -4.98083 |
| 470   | -4.93811 |
| 496   | -5.0282  |
| 520   | -5.06661 |
| 548   | -4.91881 |
| 570   | -4.90523 |
| 589.4 | -5.03884 |
| 607   | -4.18836 |
| 625   | -5.0168  |
| 640   | -5.07178 |
| 655.3 | -4.54538 |
| 673   | -4.22455 |
| 690   | -5.00681 |
| 708   | -5.03729 |
| 725.7 | -4.8588  |

---

|                               |       |          |
|-------------------------------|-------|----------|
|                               | 746   | -4.76777 |
|                               | 765   | -4.09975 |
|                               | 786   | -4.76087 |
|                               | 824   | -4.99507 |
|                               | 824   | -4.99507 |
|                               | 842.5 | -4.27308 |
|                               | 847.5 | -4.29295 |
|                               | 852.5 | -4.2107  |
|                               | 857.5 | -4.02155 |
|                               | 862.5 | -4.11624 |
|                               | 867.5 | -4.05229 |
|                               | 872.5 | -4.10531 |
|                               | 877.5 | -4.08195 |
|                               | 882.5 | -4.47368 |
|                               | 887.5 | -4.03461 |
|                               | 892.5 | -4.37398 |
|                               | 897.5 | -4.40634 |
|                               | 902.5 | -4.36298 |
|                               | 907.5 | -4.33158 |
| SZK27                         | 44.5  | -4.40556 |
| Burial depth is 162m          | 50    | -4.29669 |
| Main lithology are sandstone, | 55.5  | -4.17105 |
| argillaceous siltstone,       | 60.5  | -4.16102 |
| mudstone/ without fault       | 65.5  | -4.17721 |
| crossing                      | 72.5  | -4.19978 |
|                               | 77.5  | -4.19978 |
|                               | 82.5  | -4.22974 |
|                               | 87.5  | -4.42163 |
|                               | 92.5  | -4.44645 |

|                                 |       |          |
|---------------------------------|-------|----------|
|                                 | 97.5  | -4.44137 |
|                                 | 102.5 | -4.37587 |
|                                 | 107.5 | -4.21151 |
|                                 | 112.5 | -4.42163 |
|                                 | 117.5 | -4.42163 |
|                                 | 122.5 | -4.42163 |
|                                 | 127.5 | -4.30399 |
|                                 | 132.5 | -4.33448 |
|                                 | 137.5 | -4.33448 |
|                                 | 142.5 | -4.47278 |
| SZK30                           | 6     | -3.48122 |
| Burial depth is 600m            | 15    | -3.03758 |
| Main lithology is granodiorite/ | 23.4  | -2.93782 |
| without fault crossing          | 38    | -3.13659 |
|                                 | 40    | -3.75339 |
|                                 | 55    | -3.52453 |
|                                 | 65.7  | -3.66513 |
|                                 | 74.8  | -4.09014 |
|                                 | 91.7  | -3.96511 |
|                                 | 116.6 | -3.27173 |
|                                 | 144.5 | -3.17903 |
|                                 | 173.4 | -2.9048  |
|                                 | 178.2 | -2.82744 |
|                                 | 200   | -3.79609 |
|                                 | 224.4 | -3.66109 |
|                                 | 253   | -3.67221 |
|                                 | 279   | -3.65064 |
|                                 | 308   | -2.88294 |
|                                 | 336   | -4.03973 |

|                                |       |          |
|--------------------------------|-------|----------|
|                                | 365   | -3.64937 |
|                                | 393   | -3.40449 |
|                                | 424   | -3.65871 |
|                                | 452   | -3.59755 |
|                                | 480   | -3.94735 |
|                                | 508   | -3.96765 |
|                                | 530   | -4.02534 |
|                                | 532.5 | -4.2734  |
|                                | 537.5 | -3.86392 |
|                                | 542.5 | -3.8653  |
|                                | 547.5 | -4.28966 |
|                                | 552.5 | -4.05834 |
|                                | 557.5 | -4.13752 |
|                                | 562.5 | -4.06051 |
|                                | 567.5 | -4.05619 |
|                                | 572.5 | -4.28599 |
|                                | 577.5 | -4.4073  |
|                                | 582.5 | -4.2476  |
|                                | 587.5 | -3.9474  |
|                                | 592.5 | -4.30084 |
|                                | 597.5 | -4.26812 |
| GDH13,15,17                    | 3     | -4.16025 |
| Burial depth is 100m           | 6     | -4.09836 |
| Main lithology is argillaceous | 10    | -4.38029 |
| sandstone/ without fault       | 10.3  | -4.20706 |
| crossing                       | 10.6  | -3.53169 |
|                                | 24    | -3.64567 |
|                                | 25    | -4.72198 |
|                                | 32.55 | -4.59007 |

---

|        |          |
|--------|----------|
| 37     | -4.68503 |
| 37.1   | -4.32057 |
| 38     | -3.76862 |
| 42.3   | -4.8041  |
| 45     | -4.55523 |
| 47.85  | -4.91009 |
| 52.5   | -3.84466 |
| 52.6   | -5.05948 |
| 54     | -4.51512 |
| 57.5   | -3.8962  |
| 60     | -5.11861 |
| 62.5   | -3.93554 |
| 62.5   | -4.74854 |
| 67.5   | -3.93554 |
| 69.2   | -5.17456 |
| 72.5   | -3.98177 |
| 80     | -4.76929 |
| 90     | -5.69404 |
| 100    | -5.01328 |
| 103.1  | -5.50169 |
| 108.9  | -5.42946 |
| 114.3  | -5.4698  |
| 120    | -5.47756 |
| 125    | -5.31966 |
| 128.75 | -5.31605 |

---

## 5. Datasets collected from other literature

In the paper, the database is divided into the following datasets: igneous dataset, metamorphic dataset, sedimentary(sandstone) dataset, sedimentary(mudstone) dataset, stable dataset, unstable dataset, faulted dataset, non-faulted dataset.

Meanwhile, in order to verify the characteristics of the two models, dataset 1 and dataset 2 were extracted from the igneous dataset and metamorphic dataset. The numerical code used to generate all above datasets is available at:

<https://github.com/Chaoqi445154070/Supporting-information-for-the-exponential-paper>.
